# Supplementary material for: Spin Lattice (T1) and Magnetization Transfer Saturation (MTsat) Imaging to Monitor Age-Related Differences in Skeletal Muscle Tissue
Source: MDPI journal article supplement (doi:10.3390/diagnostics12030584), 2022-02-24
Supplement: s1 [file s1]

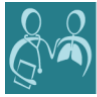

Supplemental Table S1: T1 values from the four sequences and MTsat values for each subject.

| T1 (secs): No Fat Suppression |         |        |        |        |        | T1 (secs):Fat Saturation |        |        |        |        |        | T1 (secs): Water Exc (1:1) |        |        |        |        |        |
|-------------------------------|---------|--------|--------|--------|--------|--------------------------|--------|--------|--------|--------|--------|----------------------------|--------|--------|--------|--------|--------|
| Subject                       | TA      | MG     | LG     | SOL    | TP     | Subject                  | TA     | MG     | LG     | SOL    | TP     | Subject                    | TA     | MG     | LG     | SOL    | TP     |
| Y                             | 1.38    | 1.3452 | 1.4481 | 1.4228 | 1.3917 | Y                        | 0.9083 | 0.8473 | 0.9105 | 0.8568 | 0.8582 | Y                          | 1.4023 | 1.3041 | 1.4144 | 1.3621 | 1.3857 |
| Y                             | 1.4757  | 1.4095 | 1.4619 | 1.3925 | 1.4874 | Y                        | 1.0284 | 0.8674 | 0.8275 | 0.836  | 0.9271 | Y                          | 1.472  | 1.472  | 1.3909 | 1.3909 | 1.4893 |
| Y                             | 1.5188  | 1.4519 | 1.6573 | 1.4995 | 1.5091 | Y                        | 1.0997 | 0.89   | 1.0117 | 0.9197 | 0.9459 | Y                          | 1.5165 | 1.4101 | 1.5845 | 1.4374 | 1.4713 |
| Y                             | 1.3951  | 1.5101 | 1.6237 | 1.4829 | 1.4506 | Y                        | 0.9095 | 0.937  | 1.0087 | 0.9036 | 0.8983 | Y                          | 1.3546 | 1.454  | 1.5535 | 1.4621 | 1.4237 |
| Y                             | 1.2951  | 1.4692 | 1.6133 | 1.4194 | 1.4153 | Y                        | 0.98   | 0.9171 | 1.0826 | 0.9187 | 0.912  | Y                          | 1.4489 | 1.4295 | 1.5579 | 1.3932 | 1.4146 |
| Y                             | 1.6271  | 1.4167 | 1.5886 | 1.4988 | 1.5399 | Y                        | 1.0854 | 0.906  | 0.9812 | 0.8907 | 0.9563 | Y                          | 1.6114 | 1.4047 | 1.5374 | 1.4292 | 1.4724 |
| Y                             | 1.5298  | 1.4883 | 1.696  | 1.5051 | 1.4822 | Y                        | 0.9777 | 0.9251 | 0.9975 | 0.8927 | 0.8472 | Y                          | 1.481  | 1.5043 | 1.5923 | 1.4386 | 1.4384 |
| Y                             | 1.4852  | 1.5179 | 1.6488 | 1.4731 | 1.4822 | Y                        | 1.0042 | 0.9232 | 1.0491 | 0.8927 | 0.9529 | Y                          | 1.4199 | 1.4664 | 1.6293 | 1.4311 | 1.4489 |
| Y                             | 1.4052  | 1.4335 | 1.5361 | 1.4283 | 1.427  | Y                        | 0.9227 | 0.7882 | 0.8708 | 0.8792 | 0.8838 | Y                          | 1.3843 | 1.3631 | 1.4793 | 1.3925 | 1.3846 |
| Y                             | 1.5553  | 1.6632 | 1.6344 | 1.5061 | 1.5922 | Y                        | 1.0642 | 1.02   | 1.0802 | 0.9725 | 0.9887 | Y                          | 1.5458 | 1.5835 | 1.5424 | 1.495  | 1.5061 |
| S                             | 1.4761  | 1.5908 | 1.5084 | 1.4728 | 1.4773 | S                        | 1.0307 | 0.9724 | 1.085  | 0.9397 | 0.9137 | S                          | 1.5136 | 1.5458 | 1.5893 | 1.4278 | 1.4867 |
| S                             | 1.50121 | 1.5696 | 1.6784 | 1.427  | 1.4162 | S                        | 1.043  | 1.0432 | 1.0818 | 0.946  | 0.8984 | S                          | 1.5191 | 1.523  | 1.6715 | 1.4198 | 1.3894 |
| S                             | 1.4907  | 1.5841 | 1.321  | 1.3666 | 1.5428 | S                        | 1.0009 | 0.9718 | 0.949  | 0.8863 | 0.9091 | S                          | 1.4892 | 1.5661 | 1.4646 | 1.4202 | 1.4747 |
| S                             | 1.6405  | 1.4963 | 1.604  | 1.4163 | 1.3992 | S                        | 1.0828 | 0.9817 | 1.046  | 0.9038 | 0.8932 | S                          | 1.5768 | 1.5205 | 1.6104 | 1.4446 | 1.3981 |
| S                             | 1.4535  | 1.3512 | 1.488  | 1.4971 | 1.4971 | S                        | 0.9288 | 0.9121 | 1.047  | 1.0995 | 0.9051 | S                          | 1.3753 | 1.4056 | 1.5166 | 1.5032 | 1.4003 |
| S                             | 1.565   | 1.5881 | 1.6548 | 1.5777 | 1.5453 | S                        | 1.0275 | 0.9889 | 0.8525 | 0.9219 | 0.8677 | S                          | 1.513  | 1.5178 | 1.5188 | 1.4954 | 1.4246 |
| S                             | 1.6073  | 1.3536 | 1.6006 | 1.3698 | 1.4777 | S                        | 1.1836 | 0.843  | 0.9773 | 0.8834 | 0.9054 | S                          | 1.5577 | 1.3384 | 1.5841 | 1.4001 | 1.4345 |

  

| T1 (secs): Water Exc (1:2:1) |        |        |        |        |        | MTsat (%) |        |        |        |        |        |
|------------------------------|--------|--------|--------|--------|--------|-----------|--------|--------|--------|--------|--------|
| Subject                      | TA     | MG     | LG     | SOL    | TP     | Subject   | TA     | MG     | LG     | SOL    | TP     |
| Y                            | 1.4378 | 1.3026 | 1.4315 | 1.3769 | 1.3806 | Y         | 3.352  | 3.5213 | 3.4969 | 3.6556 | 3.5334 |
| Y                            | 1.4632 | 1.3628 | 1.3993 | 1.3627 | 1.4662 | Y         | 3.1977 | 3.498  | 3.498  | 3.498  | 3.457  |
| Y                            | 1.5274 | 1.3883 | 1.5437 | 1.434  | 1.4615 | Y         | 3.1602 | 3.5351 | 3.4874 | 3.6167 | 3.3729 |
| Y                            | 1.3041 | 1.412  | 1.5035 | 1.4259 | 1.4097 | Y         | 3.153  | 3.4032 | 3.4947 | 3.5386 | 3.4089 |
| Y                            | 1.3754 | 1.3992 | 1.5197 | 1.3836 | 1.4159 | Y         | 3.2092 | 3.4516 | 3.4516 | 3.4326 | 3.3741 |
| Y                            | 1.5561 | 1.3855 | 1.5118 | 1.4038 | 1.451  | Y         | 3.1074 | 3.3594 | 3.2956 | 3.5587 | 3.4137 |
| Y                            | 1.5063 | 1.498  | 1.5776 | 1.4355 | 1.4365 | Y         | 3.1074 | 3.3594 | 3.2956 | 3.5587 | 3.4137 |
| Y                            | 1.4058 | 1.4423 | 1.5837 | 1.4235 | 1.4226 | Y         | 3.3125 | 3.5876 | 3.1622 | 3.5619 | 3.4416 |
| Y                            | 1.3811 | 1.318  | 1.4412 | 1.3863 | 1.3746 | Y         | 3.3042 | 3.799  | 3.5403 | 3.5118 | 3.5206 |
| Y                            | 1.5366 | 1.5531 | 1.4784 | 1.4618 | 1.506  | Y         | 3.0039 | 3.1642 | 3.1012 | 3.3582 | 3.1145 |
| S                            | 1.4772 | 1.5658 | 1.6047 | 1.5104 | 1.4145 | S         | 3.2177 | 3.2815 | 2.9717 | 3.2117 | 2.9717 |
| S                            | 1.529  | 1.435  | 1.6345 | 1.4238 | 1.3985 | S         | 3.1581 | 3.2145 | 2.8927 | 3.139  | 3.3046 |
| S                            | 1.7368 | 1.8419 | 1.7541 | 1.6869 | 1.7408 | S         | 3.2223 | 3.395  | 3.2327 | 3.5295 | 3.3231 |
| S                            | 1.5484 | 1.5213 | 1.5924 | 1.4045 | 1.3909 | S         | 3.1766 | 3.166  | 3.0964 | 3.5669 | 3.5558 |
| S                            | 1.3663 | 1.4349 | 1.4997 | 1.4539 | 1.3837 | S         | 3.1722 | 3.3869 | 3.1177 | 3.3288 | 3.3491 |
| S                            | 1.4928 | 1.4863 | 1.4771 | 1.4915 | 1.403  | S         | 3.0008 | 3.1547 | 3.3875 | 3.1896 | 3.4376 |
| S                            | 1.6488 | 1.3335 | 1.599  | 1.4117 | 1.4327 | S         | 3.158  | 3.5597 | 3.1774 | 3.565  | 3.4316 |

Medial gastrocnemius (MG), lateral gastrocnemius (LG), sol (SOL), tibialis posterior (TP), tibialis anterior (TA); Young (Y) and Senior (S) subjects. The T1 and MTsat values are computed in ROIs as shown in Figure 1.
